# Supplementary material for: Inoculation with Plant Growth-Promoting Bacteria and Nitrogen Doses Improves Wheat Productivity and Nitrogen Use Efficiency
Source: MDPI journal article supplement (doi:10.3390/microorganisms11041046), 2023-04-17
Supplement: s1 [file s1]

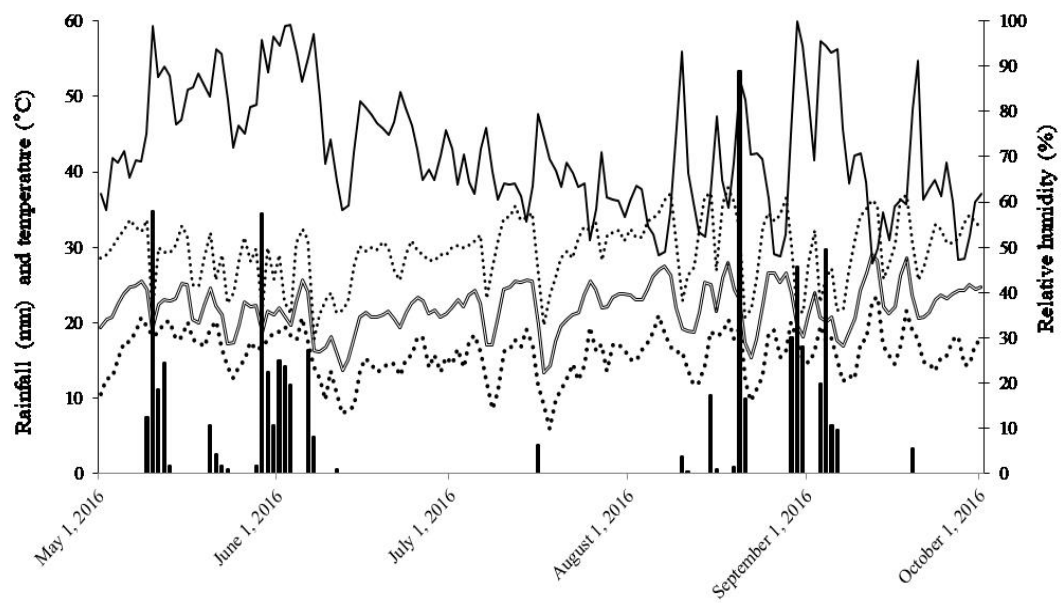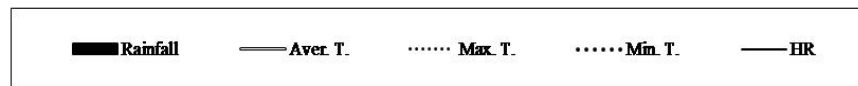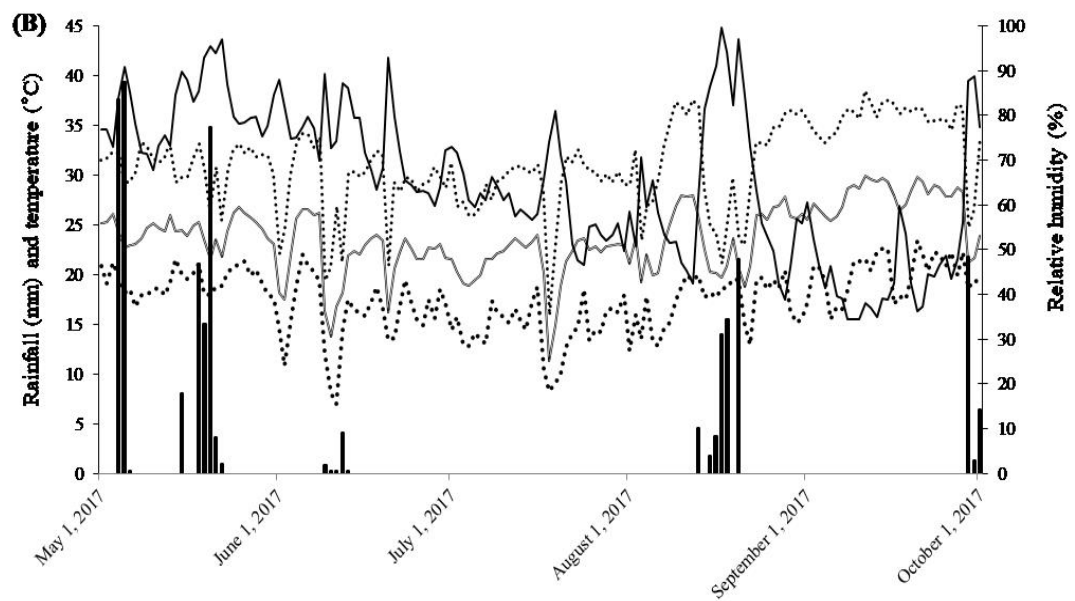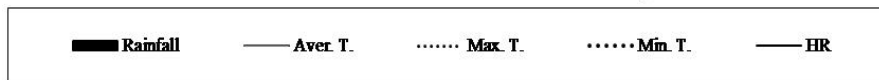

**Supplementary Figure S1.** Climate data during wheat cultivation in 2016 (A) e 2017 (B) at meteorological station of UNESP.
